# Supplementary material for: Enhanced dye illumination in dye-sensitized solar cells using TiO2/GeO2photo-anodes
Source: Royal Society of Chemistry journal article supplement (doi:10.1039/c4ta02312a), 2014-06-13
Supplement: c4ta02312a1.pdf [file c4ta02312a1.pdf]

# Enhanced dye illumination in dye-sensitized solar cells employing TiO<sub>2</sub>/GeO<sub>2</sub> photoanodes

Yanyan Duan<sup>†‡</sup>, Qunwei Tang<sup>†‡\*</sup>, Zihan Chen<sup>‡</sup>, Benlin He<sup>†</sup>, Haiyan Chen<sup>†</sup>

<sup>†</sup> Key Laboratory of Marine Chemistry Theory and Technology, Ministry of Education, Ocean University of China, Qingdao 266100, P.R. China;

<sup>‡</sup> Institute of Materials Science and Engineering, Ocean University of China, Qingdao 266100, China;

<sup>\*</sup> Key Laboratory of Nondestructive Testing, Ministry of Education, Nanchang Hangkong University, Nanchang 330063, China;

Fax/Tel: 86 532 66781690; E-mail: address: tangqunwei@ouc.edu.cn

## Supporting theory

Fresnel theory has been employed to reveal the potential mechanism of transmission enhancement in GeO<sub>2</sub> incorporated TiO<sub>2</sub> photoanodes.

$$n = \sqrt{n_0 n_s} \quad (\text{S1})$$

where  $n_0$  is the refractive index in upper layer,  $n$  is the refractive index in the middle layer, and  $n_s$  is the refractive index in the lower layer.

It is a prerequisite to match the refractive indexes well of mediums well in fabricating an antireflective film for transmission enhancement. The refractive index ( $n_0$ ) of incident light in air is 1, therefore,  $n$  should match well with square root of  $n_s$ . It is known that the refractive index of GeO<sub>2</sub> ( $n$ ) is around 1.99, whereas that is 2.55 for anatase TiO<sub>2</sub> ( $n_s$ ), suggesting that the square root of  $n_s$  is approximately 1.60. However, the further decrease of  $n_s$  benefiting from the nanoporous

structure of TiO<sub>2</sub> results in a complete matching of  $\sqrt{n_0 n_s}$  with  $n$ .

Actually, the optical dispersion of TiO<sub>2</sub> obeys [S1]:

$$n_s^2 = 5.913 + \frac{0.2441}{\lambda^2 - 0.803} \quad (\text{S2})$$

where  $\lambda$  is wavelength of incident light.

The optical dispersion of GeO<sub>2</sub> obeys [S2]:

$$n^2 = 1.286 + \frac{1.0704\lambda^2}{\lambda^2 - 0.01} + \frac{1.102\lambda^2}{\lambda^2 - 100} \quad (\text{S3})$$

From Fresnel law, we can obtain the following relationship:

$$t_{12} = \frac{2n_1}{n_1 + n}, \quad t_{23} = \frac{2n}{n_2 + n}, \quad r_{21} = \frac{n_1 - n}{n_1 + n}, \quad r_{23} = \frac{n_2 - n}{n_2 + n} \quad (\text{S4})$$

$t_{12}$  is amplitude reflectivity from air to GeO<sub>2</sub>,  $t_{23}$  is the amplitude reflectivity from GeO<sub>2</sub> to TiO<sub>2</sub>,  $r_{21}$  is the amplitude reflectivity from GeO<sub>2</sub> to air, and  $r_{23}$  is the amplitude reflectivity from GeO<sub>2</sub> to TiO<sub>2</sub>. The transmission enhancement of the GeO<sub>2</sub> incorporated TiO<sub>2</sub> photoanode after repeated reflection and transmission can be calculated according to:

$$T = \frac{(t_{12}t_{23})^2}{1 - 2r_{21}r_{23} \cos \varphi + (r_{12}r_{23})^2} \quad (\text{S5})$$

$T$  represents transmission,  $\varphi = \frac{4\pi}{\lambda} d \cos \theta$  is phase difference,  $d$  is the thickness of GeO<sub>2</sub>,  $\theta$  is the angle of incident light. In our experiment, the DSSCs are illuminated perpendicularly by the simulated solar, therefore,  $\theta$  is 0°. After simulation by a progame, we find that the theoretical fitting and the experimental curve match well in the photoanode from TiO<sub>2</sub>/0.5 wt% GeO<sub>2</sub> nanocrystallines.

## Supporting program

clear all

close all

```

lamada=linspace(0.29,1.05,1000);

n1=1*linspace(1,1,1000);

n=1*(1.286+1.0704*lamada.^2./(lamada.^2-0.01)+1.102*lamada.^2./(lamada.^2-100)).^0.5;

n2=0.5*(5.913+0.2441./(lamada.^2-0.0803)).^0.5; % 0.5

d=1e-6; %

fy=4*pi./(lamada*1e-6).*n*d;

t12=2*n1./(n1+n);

t23=2*n./(n+n2);

r21=(n1-n)/(n1+n);

r23=(n2-n)/(n2+n);

%R=((n1-n).^2.*(cos(fy/2)).^2+(n1.*n./n2-
n2).^2.*(sin(fy/2)).^2)/((n1+n).^2.*(cos(fy/2)).^2+(n1.*n./n2-n2).^2.*(sin(fy/2)).^2);

T=(t12.*t23).^2./(1-2*r21.*r23.*cos(fy)+(r21.*r23).^2);

plot(lamada,n)

figure

plot(lamada,n2)

%figure

%plot(lamada,n)

T1=T*100;

lamada1=lamada*1000;

figure

plot(lamada1,T1)

```

## **Supporting references**

- [S1] J. R. Devore, Refractive indices of rutile and sphalerite. *J. Opt. Soc. Am.* 41 (1951) 416.
- [S2] G. Ghosh, Dispersion-equation coefficients for the refractive index and birefringence of calcite and quartz. *Opt. Commun.* 163 (1999) 95.
